# Supplementary material
Source: PubMed Central journal article supplement (PMC7529660)
Supplement: NIHMS1572587-supplement-Supplemental_Material.pdf [file NIHMS1572587-supplement-Supplemental_Material.pdf]

Supplementary Table 1

*Least Squares Means and 95% Confidence Intervals for Posttraumatic Growth (PTG) and Posttraumatic Stress (PTS) By Worst Event Type (N=1574)*

| <i>Worst Traumatic Event</i>       | <i>PTG-Total<br/>M (95% CI)</i> | <i>PTG-AL<br/>M (95% CI)</i> | <i>PTG-NP<br/>M (95% CI)</i> | <i>PTG-RO<br/>M (95% CI)</i> |
|------------------------------------|---------------------------------|------------------------------|------------------------------|------------------------------|
| Bereavement                        | 33.30 (30.17, 36.55)            | 7.46 (6.74, 8.17)            | 5.50 (4.71, 6.29)            | 6.73 (6.00, 7.46)            |
| Illness or injury of someone close | 34.58 (31.28, 37.88)            | 7.73 (6.98, 8.48)            | 5.56 (4.74, 6.39)            | 7.00 (6.24, 7.76)            |
| Intimate partner violence          | 35.65 (31.88, 39.42)            | 7.66 (6.81, 8.52)            | 7.38 (6.44, 8.33)            | 6.18 (5.30, 7.05)            |
| Physical assault                   | 25.79 (20.10, 31.49)            | 5.95 (4.66, 7.24)            | 4.28 (2.86, 5.71)            | 3.97 (2.65, 5.29)            |
| Rape                               | 27.14 (23.51, 30.78)            | 5.91 (5.09, 6.74)            | 4.84 (3.93, 5.76)            | 4.79 (3.95, 5.63)            |
| Illness/operation                  | 37.14 (33.64, 40.63)            | 8.34 (7.55, 9.14)            | 6.51 (5.63, 7.39)            | 7.23 (6.42, 8.03)            |

*Note.* Values were computed as part of multivariable generalized linear models predicting each dependent variable, and adjust for age, and marital status at the time of the worst traumatic event, race, and annual household income in 2001. AL=Appreciation of Life; NP=New Possibilities; RO=Relating to Others; PS=Personal Strength; SC=Spiritual Change; M=Mean; SD=Standard Deviation. Total PTG scores range from 0-50, and each PTG domain ranges from 0-10, with higher scores indicating greater PTG. PTS ranges from 17-85 with higher scores indicating more severe PTS.

Supplementary Table 1 (cont.)

*Least Squares Means and 95% Confidence Intervals for Posttraumatic Growth (PTG) and Posttraumatic Stress (PTS) By Worst Event Type (N=1574)*

| <i>Worst Traumatic Event</i>       | <i>PTG-PS</i>     | <i>PTG-SC</i>     | <i>PTS</i>           |
|------------------------------------|-------------------|-------------------|----------------------|
|                                    | <i>M (95% CI)</i> | <i>M (95% CI)</i> | <i>M (95% CI)</i>    |
| Bereavement                        | 7.21 (6.51, 7.92) | 6.40 (5.50, 7.30) | 32.60 (29.35, 35.85) |
| Illness or injury of someone close | 7.51 (6.77, 8.25) | 6.77 (5.83, 7.71) | 28.77 (25.36, 32.17) |
| Intimate partner violence          | 8.26 (7.41, 9.11) | 6.17 (5.09, 7.24) | 36.78 (32.89, 40.68) |
| Physical assault                   | 6.14 (4.86, 7.43) | 5.45 (3.82, 7.07) | 38.50 (32.61, 44.38) |
| Rape                               | 6.77 (5.95, 7.59) | 4.93 (3.79, 5.87) | 42.53 (38.79, 46.27) |
| Illness/operation                  | 7.86 (7.07, 8.64) | 7.20 (6.20, 8.20) | 31.39 (27.7, 35.01)  |

*Note.* Values were computed as part of multivariable generalized linear models predicting each dependent variable, and adjust for age, and marital status at the time of the worst traumatic event, race, and annual household income in 2001. AL=Appreciation of Life; NP=New Possibilities; RO=Relating to Others; PS=Personal Strength; SC=Spiritual Change; *M*=Mean; *SD*=Standard Deviation. Total PTG scores range from 0-50, and each PTG domain ranges from 0-10, with higher scores indicating greater PTG. PTS ranges from 17-85 with higher scores indicating more severe PTS.
